# Supplementary material for: Selective catalytic reduction of NOx with ammonia (NH3-SCR) over copper loaded LEV type zeolites synthesized with different templates
Source: Royal Society of Chemistry journal article supplement (doi:10.1039/d2cp01512a), 2022-01-01
Supplement: d2cp01512a1.pdf [file d2cp01512a1.pdf]

## Supplementary Information

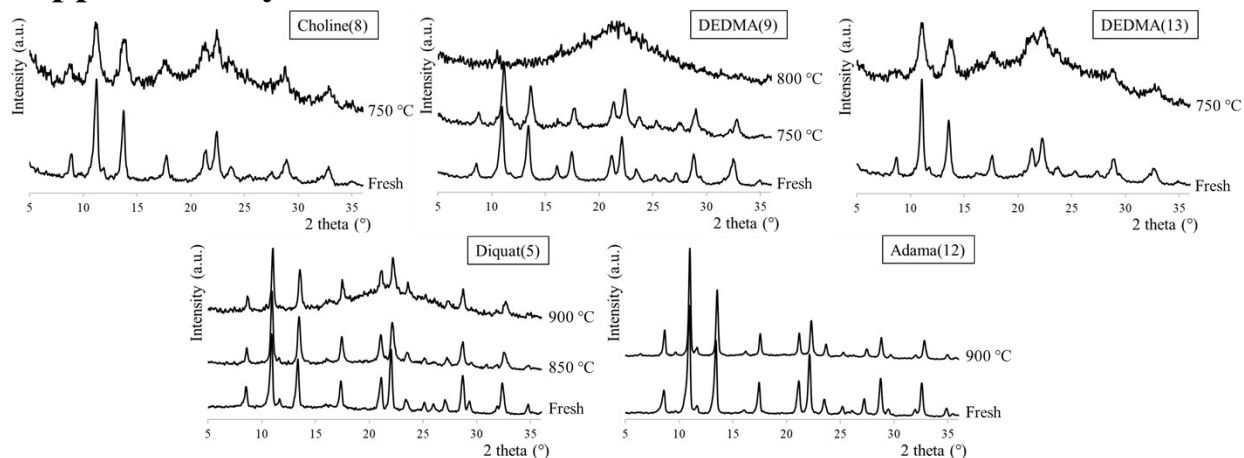

Figure S1 XRD diffractogram of fresh and hydrothermally aged Cu loaded LEV zeolite catalysts.

Table S1 NO<sub>x</sub> conversion in function of temperature of all Cu loaded LEV zeolite catalysts.

| Reaction T (°C) | NO <sub>x</sub> conversion (%) |          |           |           |           |
|-----------------|--------------------------------|----------|-----------|-----------|-----------|
|                 | Choline(8)                     | DEDMA(9) | DEDMA(13) | Diquat(5) | Adama(12) |
| 150             | 44                             | 35       | 28        | 41        | 11        |
| 175             | 83                             | 69       | 51        | 79        | 7         |
| 200             | 100                            | 96       | 88        | 95        | 8         |
| 250             | 100                            | 100      | 98        | 100       | 38        |
| 300             | 94                             | 93       | 90        | 94        | 72        |
| 350             | 87                             | 86       | 82        | 82        | 69        |
| 400             | 86                             | 84       | 80        | 78        | 69        |
| 450             | 85                             | 81       | 77        | 78        | 67        |
| 150             | 42                             | 37       | 24        | 39        | 11        |

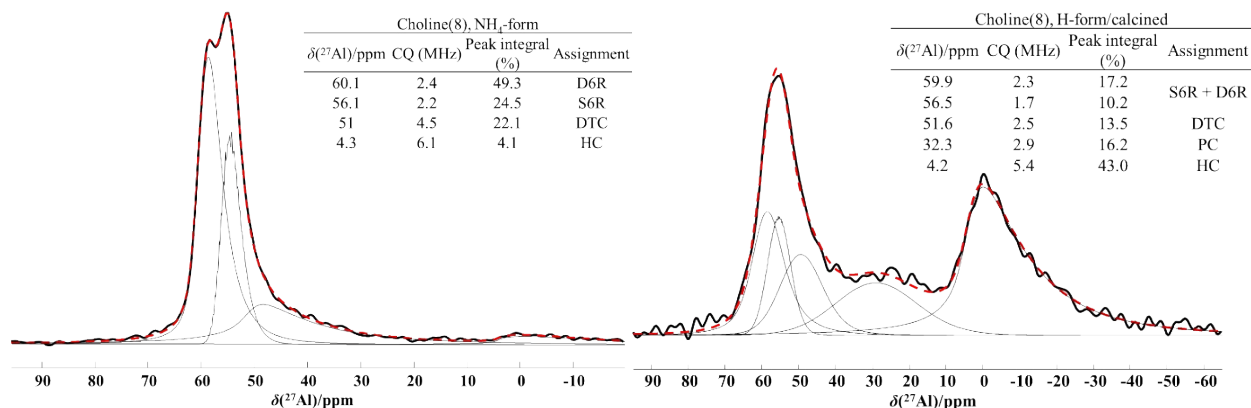

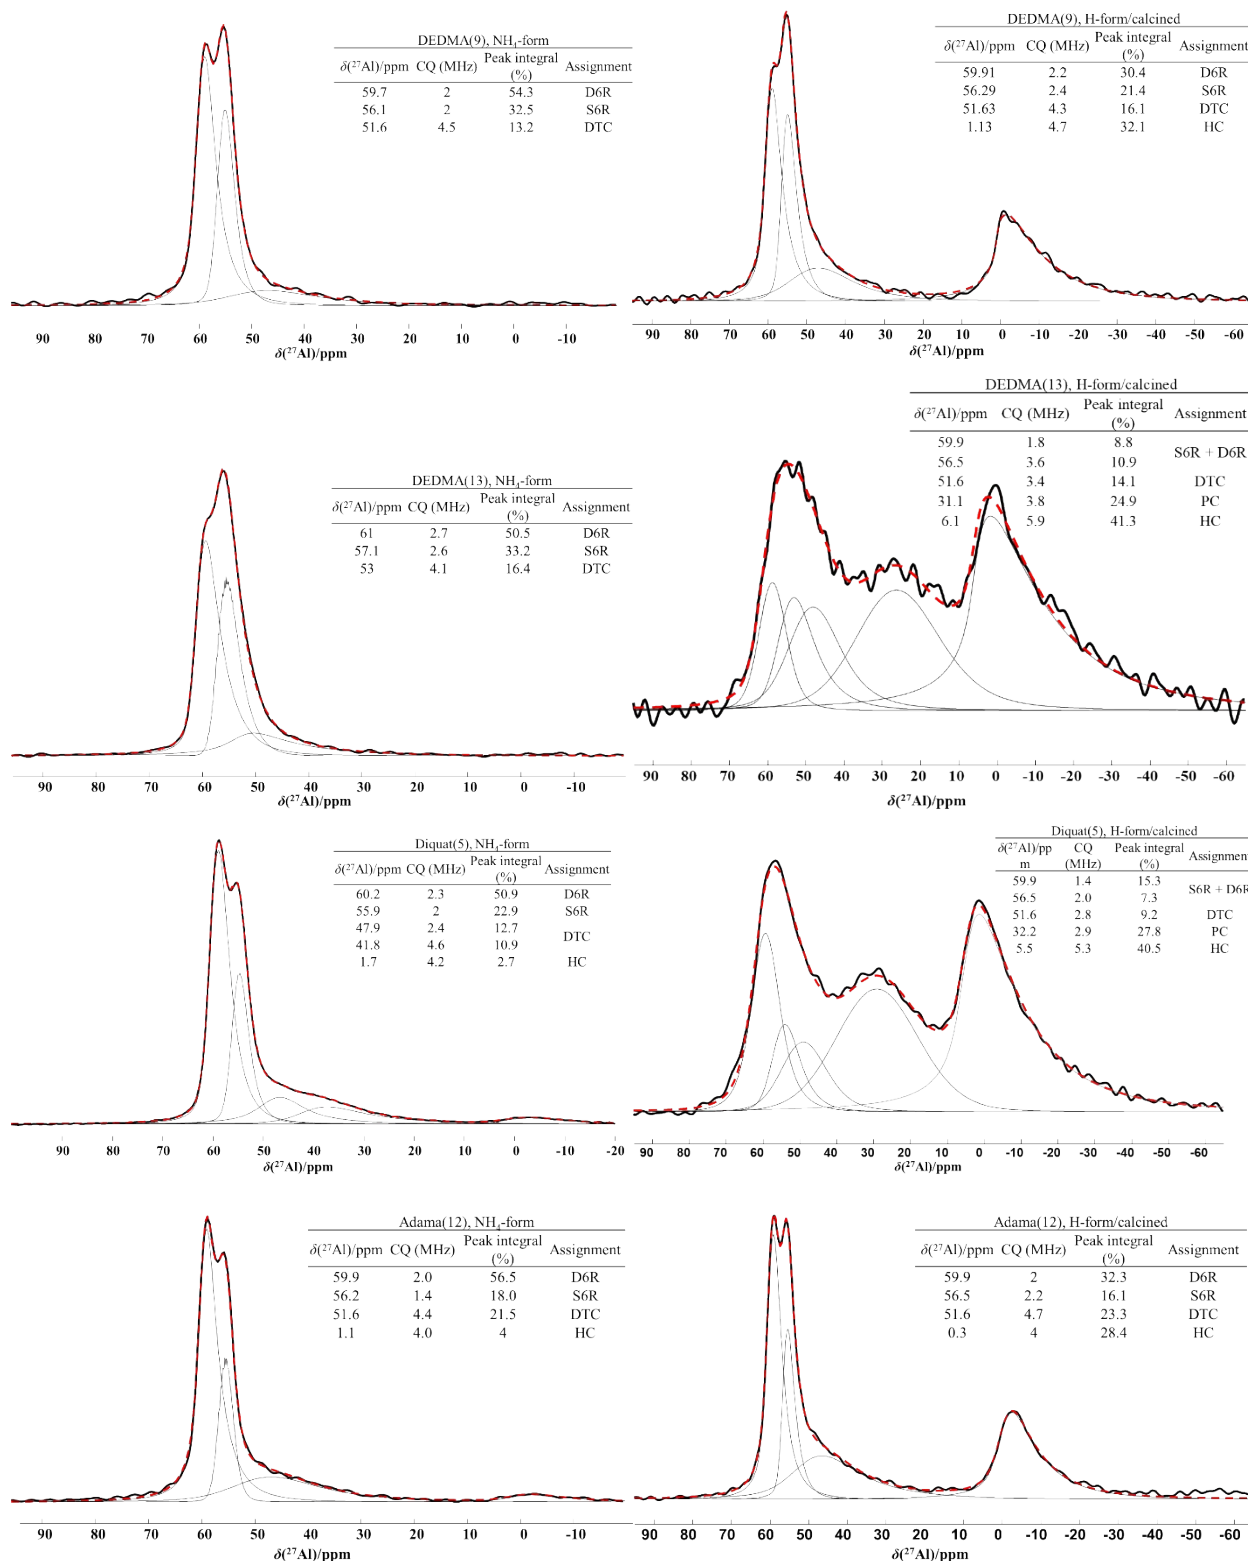

Figure S2 Signal decomposition of  $^{27}\text{Al}\{^1\text{H}\}$  MAS NMR of Choline(8), DEDMA(9), DEDMA(13), DIQUAT(5) and ADAMA(12) in both their  $\text{NH}_4^-$  and H-/calced form recorded at 11.74 T (500 MHz) with MAS frequency of 15 kHz. Bold black lines represent the original spectrum, gray lines represent the individual decomposition functions and red dashed lines represent the sum of the decomposition functions. Codes used in inserted tables are used as follows: D6R represents double six rings, S6R represents single

six rings, DTC represents distorted tetrahedral coordinated Al, PC represents penta-coordinated Al and HC represents hexa-coordinated Al.
